# Supplementary material
Source: publisher site journal article supplement (https://www.spandidos-publications.com/3269/downloadSupplementary)

Figure S1. Transfection efficiency of A431 and SCL1. (A and B) Transfection efficiency was assessed by flow cytometry following NC-siRNA or TMEM40-siRNA transfection in A431 cells. (C and D) Transfection efficiency was assessed by flow cytometry following NC-siRNA TMEM40-siRNA transfection in SCL1 cells. NC, negative control; TMEM40, transmembrane protein 40; siRNA, small interfering RNA.

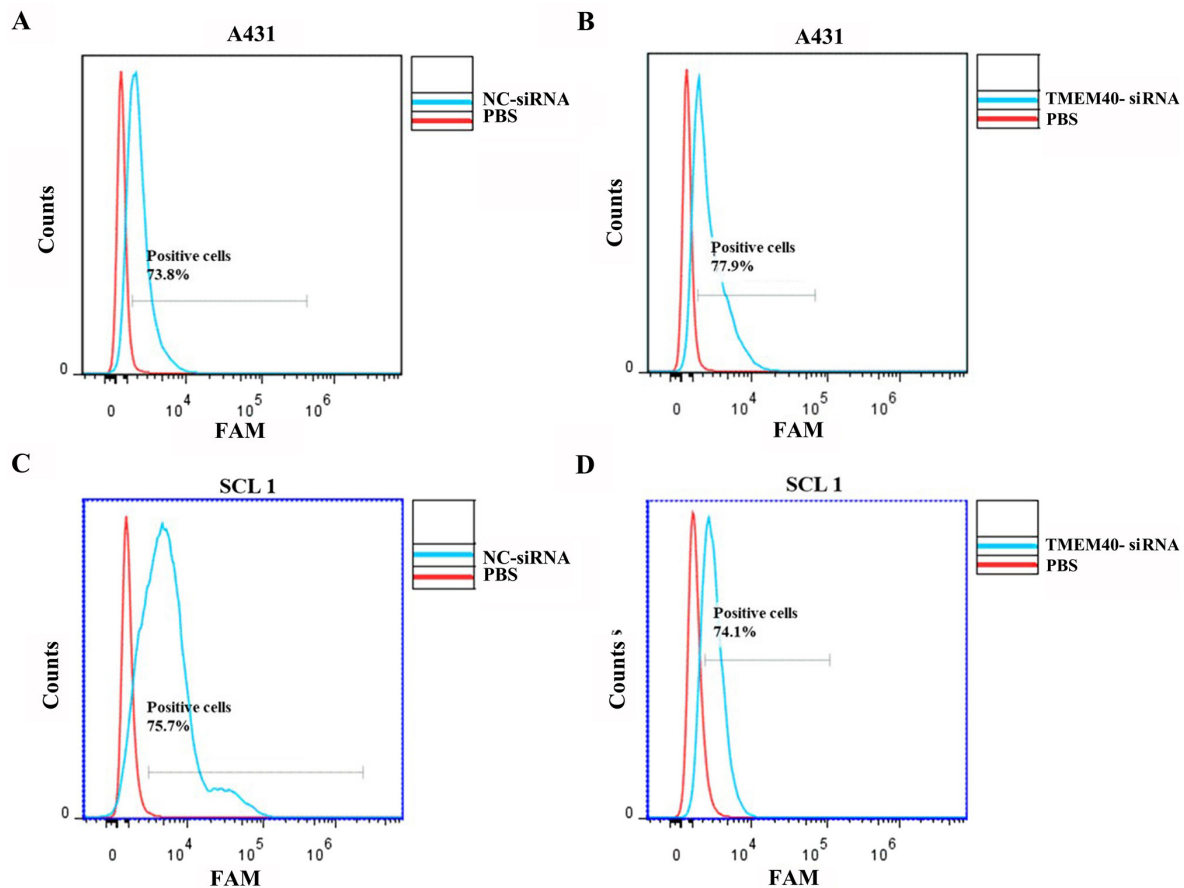

Supplement: Supplementary file 1 [file downloadSupplementary]
